# Supplementary material for: Ligand coupling mechanism of the human serotonin transporter differentiates substrates from inhibitors
Source: PubMed Central journal article supplement (PMC10776687; doi:10.1038/s41467-023-44637-6), 2024-01-10
Supplement: 41467_2023_44637_MOESM3_ESM.pdf [file 41467_2023_44637_MOESM3_ESM.pdf]

## Reporting Summary

Nature Portfolio wishes to improve the reproducibility of the work that we publish. This form provides structure for consistency and transparency in reporting. For further information on Nature Portfolio policies, see our [Editorial Policies](#) and the [Editorial Policy Checklist](#).

### Statistics

For all statistical analyses, confirm that the following items are present in the figure legend, table legend, main text, or Methods section.

- |                                     |                                                                                                                                                                                                                                                                                                |
|-------------------------------------|------------------------------------------------------------------------------------------------------------------------------------------------------------------------------------------------------------------------------------------------------------------------------------------------|
| n/a                                 | Confirmed                                                                                                                                                                                                                                                                                      |
| <input type="checkbox"/>            | <input checked="" type="checkbox"/> The exact sample size ( $n$ ) for each experimental group/condition, given as a discrete number and unit of measurement                                                                                                                                    |
| <input type="checkbox"/>            | <input checked="" type="checkbox"/> A statement on whether measurements were taken from distinct samples or whether the same sample was measured repeatedly                                                                                                                                    |
| <input checked="" type="checkbox"/> | <input type="checkbox"/> The statistical test(s) used AND whether they are one- or two-sided<br><i>Only common tests should be described solely by name; describe more complex techniques in the Methods section.</i>                                                                          |
| <input checked="" type="checkbox"/> | <input type="checkbox"/> A description of all covariates tested                                                                                                                                                                                                                                |
| <input checked="" type="checkbox"/> | <input type="checkbox"/> A description of any assumptions or corrections, such as tests of normality and adjustment for multiple comparisons                                                                                                                                                   |
| <input type="checkbox"/>            | <input checked="" type="checkbox"/> A full description of the statistical parameters including central tendency (e.g. means) or other basic estimates (e.g. regression coefficient) AND variation (e.g. standard deviation) or associated estimates of uncertainty (e.g. confidence intervals) |
| <input checked="" type="checkbox"/> | <input type="checkbox"/> For null hypothesis testing, the test statistic (e.g. $F$ , $t$ , $r$ ) with confidence intervals, effect sizes, degrees of freedom and $P$ value noted<br><i>Give <math>P</math> values as exact values whenever suitable.</i>                                       |
| <input checked="" type="checkbox"/> | <input type="checkbox"/> For Bayesian analysis, information on the choice of priors and Markov chain Monte Carlo settings                                                                                                                                                                      |
| <input checked="" type="checkbox"/> | <input type="checkbox"/> For hierarchical and complex designs, identification of the appropriate level for tests and full reporting of outcomes                                                                                                                                                |
| <input checked="" type="checkbox"/> | <input type="checkbox"/> Estimates of effect sizes (e.g. Cohen's $d$ , Pearson's $r$ ), indicating how they were calculated                                                                                                                                                                    |

*Our web collection on [statistics for biologists](#) contains articles on many of the points above.*

### Software and code

Policy information about [availability of computer code](#)

|                 |                                                                                                                                                                                                              |
|-----------------|--------------------------------------------------------------------------------------------------------------------------------------------------------------------------------------------------------------|
| Data collection | Gromacs 2019.3<br>Clampex 11.0.3                                                                                                                                                                             |
| Data analysis   | R Studio 2022.07.0<br>Modeller 9.20<br>Pymol 2.5.2<br>MD Analysis 0.19.2<br>GraphPad Prism 9.5.1<br>Clampfit 10.7<br>Python 3.x<br>Force Distribution Analysis (FDA) 2.9.1<br>pyEMMA<br>Microsoft Office 365 |

For manuscripts utilizing custom algorithms or software that are central to the research but not yet described in published literature, software must be made available to editors and reviewers. We strongly encourage code deposition in a community repository (e.g. GitHub). See the Nature Portfolio [guidelines for submitting code & software](#) for further information.

## Data

Policy information about [availability of data](#)

All manuscripts must include a [data availability statement](#). This statement should provide the following information, where applicable:

- Accession codes, unique identifiers, or web links for publicly available datasets
- A description of any restrictions on data availability
- For clinical datasets or third party data, please ensure that the statement adheres to our [policy](#)

All data, including the source data of the figures as well as each start end structure of SERT, extracted from all trajectories, are available at Zenodo (<https://zenodo.org>) with the DOI: 10.5281/zenodo.10381879. The PDB entry (5I71) for the crystal structure of SERT in the outward-open state with a resolution of 3.15 Å [<https://www.rcsb.org/structure/5I71>] was used as a starting point to generate MD input structures. The PDB entries for SERT in the outward-open (5I71) [<https://www.rcsb.org/structure/5I71>], the occluded (6DZV) [<https://www.rcsb.org/structure/6DZV>], and inward-open (6DZZ) [<https://www.rcsb.org/structure/6DZZ>] were used to generate reference distances across the outer vestibule. The X-ray structure of Drosophila dopamine transporter in complex with S1-bound cocaine (4XP4) [<https://www.rcsb.org/structure/4XP4>] was used as a template to manually dock cocaine into outward-open ion-bound SERT.

## Research involving human participants, their data, or biological material

Policy information about studies with [human participants or human data](#). See also policy information about [sex, gender \(identity/presentation\), and sexual orientation](#) and [race, ethnicity and racism](#).

Reporting on sex and gender

The study did not include human participants

Reporting on race, ethnicity, or other socially relevant groupings

The study did not include human participants

Population characteristics

The study did not include human participants

Recruitment

The study did not include human participants

Ethics oversight

The study did not include human participants

Note that full information on the approval of the study protocol must also be provided in the manuscript.

## Field-specific reporting

Please select the one below that is the best fit for your research. If you are not sure, read the appropriate sections before making your selection.

Life sciences  Behavioural & social sciences  Ecological, evolutionary & environmental sciences

For a reference copy of the document with all sections, see [nature.com/documents/nr-reporting-summary-flat.pdf](https://nature.com/documents/nr-reporting-summary-flat.pdf)

## Life sciences study design

All studies must disclose on these points even when the disclosure is negative.

Sample size

No sample size calculations were performed for this study. For in vitro assays, a minimum of n=3 biologically independent experiments measured in triplicates, were conducted. For electrophysiological measurements, a minimum of n=5 independent cells per ligand were recorded. The sample size for ex vivo experiments was modeled based on previously published work, demonstrating fenfluramine-mediated [3H]5HT release in hippocampal brain tissue (DOI 10.1021/acchemneuro.8b00689). In silico sample size: n=10 independent trajectories for each condition (apo, M-5HT, 5HT, P-5HT, B-5HT, and cocaine). All sample sizes are described in detail in every single figure legend.

Data exclusions

Rarely extreme outliers in in vitro assays were cautiously excluded, otherwise data was kept as complete as possible

Replication

Experiments were at least conducted in three (n=3) individual, biologically independent assays, in triplicate if appropriate. Rarely attempts at replication were unsuccessful and in such cases experiments were repeated two more times before excluding any gathered data. For MD simulations, 10 replicas per conditions were conducted. For ex vivo studies, replications were performed with the number of individual mice used in each experiment.

Randomization

No randomization was performed in this study. The compounds (M-5HT, P-5HT, and B-5HT) displayed different colours when dissolved in solvent. In MD simulations, all molecules are always explicitly present.

Blinding

Functional in vitro and ex vivo studies do not require blinding, as the data obtained from these experiments is objective and does not involve any subjective assessment by the experimenter. Similarly, analysis of MD data is objective.

## Reporting for specific materials, systems and methods

We require information from authors about some types of materials, experimental systems and methods used in many studies. Here, indicate whether each material, system or method listed is relevant to your study. If you are not sure if a list item applies to your research, read the appropriate section before selecting a response.

## Materials & experimental systems

|     |                                     |                               |
|-----|-------------------------------------|-------------------------------|
| n/a | <input checked="" type="checkbox"/> | Included in the study         |
|     | <input checked="" type="checkbox"/> | Antibodies                    |
|     | <input checked="" type="checkbox"/> | Eukaryotic cell lines         |
|     | <input checked="" type="checkbox"/> | Palaeontology and archaeology |
|     | <input checked="" type="checkbox"/> | Animals and other organisms   |
|     | <input checked="" type="checkbox"/> | Clinical data                 |
|     | <input checked="" type="checkbox"/> | Dual use research of concern  |
|     | <input checked="" type="checkbox"/> | Plants                        |

## Methods

|     |                                     |                        |
|-----|-------------------------------------|------------------------|
| n/a | <input checked="" type="checkbox"/> | Included in the study  |
|     | <input checked="" type="checkbox"/> | ChIP-seq               |
|     | <input checked="" type="checkbox"/> | Flow cytometry         |
|     | <input checked="" type="checkbox"/> | MRI-based neuroimaging |

## Eukaryotic cell lines

Policy information about [cell lines and Sex and Gender in Research](#)

|                                                                      |                                                                                                           |
|----------------------------------------------------------------------|-----------------------------------------------------------------------------------------------------------|
| Cell line source(s)                                                  | ATCC, human kidney cells 293                                                                              |
| Authentication                                                       | Authenticated by STR profiling at the Medical University of Graz (Cell Culture Core Facility)             |
| Mycoplasma contamination                                             | Mycoplasma contamination was regularly tested and could be ruled out for all cell lines used in the study |
| Commonly misidentified lines<br>(See <a href="#">ICLAC</a> register) | None                                                                                                      |

## Animals and other research organisms

Policy information about [studies involving animals](#); [ARRIVE guidelines](#) recommended for reporting animal research, and [Sex and Gender in Research](#)

|                         |                                                                                                                                                                                                                                                                                                                                                                        |
|-------------------------|------------------------------------------------------------------------------------------------------------------------------------------------------------------------------------------------------------------------------------------------------------------------------------------------------------------------------------------------------------------------|
| Laboratory animals      | Adult male WT C57Bl6/N mice , 12 weeks old                                                                                                                                                                                                                                                                                                                             |
| Wild animals            | Study did not involve wild animals                                                                                                                                                                                                                                                                                                                                     |
| Reporting on sex        | Only male mice were included                                                                                                                                                                                                                                                                                                                                           |
| Field-collected samples | Study did not involve samples collected from the field                                                                                                                                                                                                                                                                                                                 |
| Ethics oversight        | All animals experiments were conducted in agreement with the ARRIVE guidelines and the UK Animals (Scientific Procedures Act, 1986 and associated guidelines, EU Directive 2010/63/EU for animal experiments) and approved by the national ethical committee on animal care and use (Bundesministerium für Bildung, Wissenschaft und Forschung: BMBWF-2022-0.121.471). |

Note that full information on the approval of the study protocol must also be provided in the manuscript.

## Plants

|                       |      |
|-----------------------|------|
| Seed stocks           | None |
| Novel plant genotypes | None |
| Authentication        | None |

## Plots

Confirm that:

- The axis labels state the marker and fluorochrome used (e.g. CD4-FITC).
- The axis scales are clearly visible. Include numbers along axes only for bottom left plot of group (a 'group' is an analysis of identical markers).
- All plots are contour plots with outliers or pseudocolor plots.
- A numerical value for number of cells or percentage (with statistics) is provided.

## Methodology

Sample preparation

HEK293 cells stably expressing YhSERT WT were dissociated by incubation in 1X Trypsin-EDTA (0.5 g x L-1) for 5 minutes, resuspended in FBS-free DMEM, and the usage of a 40 µm cell strainer (Corning Nr. 352235). See Methods section.

Instrument

BD FACSAria Fusion Flow Cytometer (BD Biosciences). See Methods section.

Software

BD FACSDiva version 8.0.2 and FlowJo version (TreeStar) 10.10.0 software. See Methods section.

Cell population abundance

Details are described in the Methods section and population abundances are depicted in the Supplementary Information (SI Fig. 5)

Gating strategy

Population 1 (P1) was defined by a forward scatter (FSC)-area (A) and a side scatter (SSC)-A to facilitate the removal of debris. Population 2 (P2) was defined by FSC-A and FSC-height (H) to identify cells of interest characterised by size and granularity, respectively. The final population, population 3 (P3), was based on N-terminally fused eYFP fluorescence intensity, defined by fluorescein isothiocyanate (FITC)-A (488 nm, 530/30 emission filter) and allophycocyanin (APC)-A (640 nm, 670/30 emission filter). See Methods section.

- Tick this box to confirm that a figure exemplifying the gating strategy is provided in the Supplementary Information.
